# Supplementary material for: Exploring the Antimicrobial Stewardship Educational Needs of Healthcare Students and the Potential of an Antimicrobial Prescribing App as an Educational Tool in Selected African Countries
Source: MDPI journal article supplement (doi:10.3390/antibiotics11050691), 2022-05-19

## Final-CwPAMS App Student Survey

The Commonwealth Partnerships for Antimicrobial Stewardship (CwPAMS) App was launched in 2020 by the Commonwealth Pharmacist Association. Aim of the app is to provide antimicrobial prescribing guidelines and serve as an educational tool for prescribers, pharmacists, nurses, dentists and other healthcare professionals.

Healthcare students in Nigeria, Uganda, Tanzania, Zambia, Malawi, Kenya, Zambia and Sierra Leone are being invited to participate in a survey in order to understand possibilities for use of the app by health students

Participation is voluntary. All data collected will be stored securely and anonymously, in line with best practice, data protection and confidentiality guidelines. Where there are any publications as a result of the survey, they will be in combination with other questionnaires completed by healthcare students in other Commonwealth countries. Deadline for completion - 20th May 2021

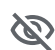

diane.ashiru-oredope@commonwealthpharmacy.org (not shared) [Switch account](#)

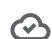

\* Required

I give my consent to contribute to this study \*

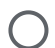

Yes

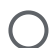

No

What career are you currently studying for? \*

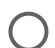

Medicine

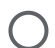

Pharmacy

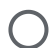

Nursing

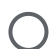

Dentistry

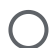

Health sciences e.g. biomedical sciences

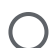

Other:

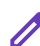

How many years is the undergraduate degree for your chosen career? \*

- ☐ 3 years
- ☐ 4 years
- ☐ 5 years
- ☐ 6 years
- ☐ > 6 years
- ☐ Other:

Year of Study \*

- ☐ First year
- ☐ Second year
- ☐ Third year
- ☐ Fourth year
- ☐ Fifth year
- ☐ Other:

What is the name of your university \*

Your answer

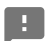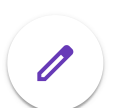

What country is your university in? \*

- ☐ Ghana
- ☐ Uganda
- ☐ Tanzania
- ☐ Zambia
- ☐ Kenya
- ☐ Sierra Leone
- ☐ Malawi
- ☐ Nigeria
- ☐ Other:

Have you heard about antimicrobial stewardship (AMS) before now?

- ☐ Yes
- ☐ No
- ☐ Unsure

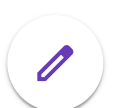

Have you had any teaching about antibiotic treatment and prudent antibiotic use during your undergraduate degree?

|                                                    | Yes                   | No                    | Unsure                |
|----------------------------------------------------|-----------------------|-----------------------|-----------------------|
| Prudent antibiotic use                             | <input type="radio"/> | <input type="radio"/> | <input type="radio"/> |
| Management of infections (diagnosis of infections) | <input type="radio"/> | <input type="radio"/> | <input type="radio"/> |
| Management of infections (antibiotic treatment)    | <input type="radio"/> | <input type="radio"/> | <input type="radio"/> |

Have any of your examinations included questions about antibiotic treatment or prudent use of antibiotics?

|                                                    | Yes                   | No                    | Unsure                |
|----------------------------------------------------|-----------------------|-----------------------|-----------------------|
| Prudent antibiotic use                             | <input type="radio"/> | <input type="radio"/> | <input type="radio"/> |
| Management of infections (diagnosis of infections) | <input type="radio"/> | <input type="radio"/> | <input type="radio"/> |
| Management of infections (antibiotic treatment)    | <input type="radio"/> | <input type="radio"/> | <input type="radio"/> |

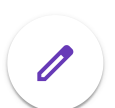

Which of the following methods of teaching have been used to teach you about prudent use of antibiotics/antibiotic treatment and how useful would you rate them?

|                                                                                                                        | Yes                   | No                    | Unsure                |
|------------------------------------------------------------------------------------------------------------------------|-----------------------|-----------------------|-----------------------|
| Lectures (with >15 people)                                                                                             | <input type="radio"/> | <input type="radio"/> | <input type="radio"/> |
| Small group teaching (with <15 people)                                                                                 | <input type="radio"/> | <input type="radio"/> | <input type="radio"/> |
| Discussions of clinical cases and vignettes                                                                            | <input type="radio"/> | <input type="radio"/> | <input type="radio"/> |
| Active learning assignments (e.g. article reading, group work, preparing an oral presentation)                         | <input type="radio"/> | <input type="radio"/> | <input type="radio"/> |
| E-learning                                                                                                             | <input type="radio"/> | <input type="radio"/> | <input type="radio"/> |
| Role play or communication skills sessions dealing with patients demanding antibiotic training                         | <input type="radio"/> | <input type="radio"/> | <input type="radio"/> |
| Infectious diseases clinical placement (i.e. clinical rotation or training in infectious diseases, involving patients) | <input type="radio"/> | <input type="radio"/> | <input type="radio"/> |
| Microbiology clinical placement                                                                                        | <input type="radio"/> | <input type="radio"/> | <input type="radio"/> |
| Peer or near peer-teaching (i.e. teaching led by other students or recently qualified doctors)                         | <input type="radio"/> | <input type="radio"/> | <input type="radio"/> |
| Use of digital resources such as                                                                                       | <input type="radio"/> | <input type="radio"/> | <input type="radio"/> |

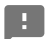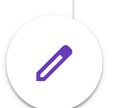

apps

Do you think the rate of indiscriminate antimicrobial use in your country is alarming?

- ☐ Yes
- ☐ No
- ☐ Maybe
- ☐ Unsure

Do you know any reference source for information on antimicrobials?

- ☐ Yes
- ☐ No
- ☐ Maybe

What are the reference sources that you currently use?

Your answer

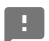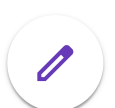

How much do you agree with the following statements

|                                                                                                                               | Strongly disagree     | Disagree              | Neutral               | Agree                 | Strongly agree        |
|-------------------------------------------------------------------------------------------------------------------------------|-----------------------|-----------------------|-----------------------|-----------------------|-----------------------|
| Antimicrobial resistance (AMR) is a recurring theme in your learning ?                                                        | <input type="radio"/> |
| There is enough educational content around AMR/AMS in your institution                                                        | <input type="radio"/> |
| Do you think more learning content about AMR and stewardship opportunities should be made available?                          | <input type="radio"/> |
| An App that provides important information about antimicrobials will be useful for your personal learning?                    | <input type="radio"/> |
| Reinforcement of national campaigns around prudent antimicrobial use will help spread information about antibiotic resistance | <input type="radio"/> |
| Will social media handles among student                                                                                       | <input type="radio"/> |

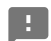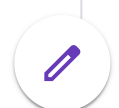

health  
professionals  
help to raise  
more awareness  
of antimicrobial  
stewardship?

Antimicrobial  
resistance is not  
really as it  
seems because  
new antibiotics  
are developed  
yearly by  
scientists

☐☐☐☐☐

I am likely to  
engage with an  
educational tool  
such as an App  
on my phone to  
learn about  
antimicrobials

☐☐☐☐☐

Having an  
offline and on-  
the-go medical  
information app  
will help me  
make more  
informed  
choices about  
antibiotics

☐☐☐☐☐

What sources of medical reference do you use the most for information?

- ☐ BNF
- ☐ Textbooks
- ☐ Online libraries
- ☐ Other

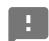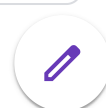



What challenges do you face in getting up-to-date drug information as a student?

- ☐ Internet access
- ☐ Lack of resources
- ☐ Power Outage
- ☐ Other:

What social media channel do you think students relate with the most?

- ☐ Instagram
- ☐ Twitter
- ☐ Facebook
- ☐ Other:

Which of the following do you think is the highest implicating factor in AMR?

- ☐ Not completing a full course of antibiotics
- ☐ Improper management of left over antibiotics
- ☐ Inappropriate antibiotic prescribing
- ☐ Poor hygiene
- ☐ Lack of infection control
- ☐ Other:

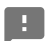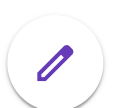

Who do you think has the greatest responsibility for antimicrobial stewardship?

- ☐ Ministry of health
- ☐ Medical institutions
- ☐ Healthcare professionals
- ☐ Other:

On which of the following topics, if any would you like to receive more information?

- ☐ How to use antibiotics
- ☐ Resistance to antibiotics
- ☐ Medical conditions for which antibiotics are used
- ☐ Hygiene and infection control measures
- ☐ Other:

Which of these educational tools will be a part of your routine learning if available?

- ☐ Printed guidelines on antibiotics
- ☐ An antimicrobial app
- ☐ Antimicrobial journals
- ☐ Other:

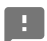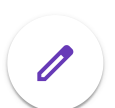

Answer whether you believe these statements are true or false.

|                                                                                                 | True                  | False                 | Unsure                | Do not know           |
|-------------------------------------------------------------------------------------------------|-----------------------|-----------------------|-----------------------|-----------------------|
| Antibiotics are effective against viruses                                                       | <input type="radio"/> | <input type="radio"/> | <input type="radio"/> | <input type="radio"/> |
| Antibiotics are effective against cold and flu                                                  | <input type="radio"/> | <input type="radio"/> | <input type="radio"/> | <input type="radio"/> |
| Unnecessary use of antibiotics make them become ineffective                                     | <input type="radio"/> | <input type="radio"/> | <input type="radio"/> | <input type="radio"/> |
| Taking antibiotics has associated side effects or risks such as diarrhoea, colitis, allergies   | <input type="radio"/> | <input type="radio"/> | <input type="radio"/> | <input type="radio"/> |
| Every person treated with antibiotics is at an increased risk of antibiotic resistant infection | <input type="radio"/> | <input type="radio"/> | <input type="radio"/> | <input type="radio"/> |
| Bacteria that are resistant to antibiotics spread easily from person to person                  | <input type="radio"/> | <input type="radio"/> | <input type="radio"/> | <input type="radio"/> |
| Healthy people can carry antibiotic resistant bacteria                                          | <input type="radio"/> | <input type="radio"/> | <input type="radio"/> | <input type="radio"/> |
| The use of antibiotics to stimulate growth                                                      | <input type="radio"/> | <input type="radio"/> | <input type="radio"/> | <input type="radio"/> |

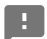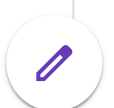

in farm animals  
is legal in the EU

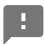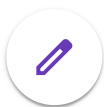

How strongly do you agree or disagree with the following?

|                                                                                                               | Strongly agree        | Agree                 | Neutral               | Disagree              | Strongly Disagree     |
|---------------------------------------------------------------------------------------------------------------|-----------------------|-----------------------|-----------------------|-----------------------|-----------------------|
| Most coughs, colds and sore throats get better on their own without the need for antibiotics                  | <input type="radio"/> |
| Prescribing, dispensing or administering inappropriate or unnecessary antibiotics is professionally unethical | <input type="radio"/> |
| There are enough antibiotics under development worldwide to keep up with the problem of resistance            | <input type="radio"/> |
| Antibiotic resistance is a national problem                                                                   | <input type="radio"/> |
| Do you think antibiotic resistance will be a problem for your future individual practice?                     | <input type="radio"/> |

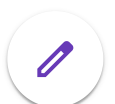

Within the last 3 years have you been involved in a campaign linked to prudent use of antibiotics?

- ☐ Yes
- ☐ No
- ☐ Cannot remember

Please provide further details of how you were involved

Your answer

Approximately how long did it take you to complete the survey

- ☐ <5mins
- ☐ 6-10mins
- ☐ 11-15mins
- ☐ >15mins

Please use this space to provide any other relevant comments or feedback

Your answer

Submit

Clear form

Never submit passwords through Google Forms.

This form was created inside of Commonwealth Pharmacists Association. [Report Abuse](#)

Google Forms

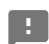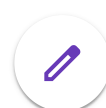

Supplement: s1 [file s1]
