# Supplementary material for: Exploring the Antimicrobial Stewardship Educational Needs of Healthcare Students and the Potential of an Antimicrobial Prescribing App as an Educational Tool in Selected African Countries
Source: MDPI journal article supplement (doi:10.3390/antibiotics11050691), 2022-05-19
Supplement: s1 [file s1]

## Supplementary Materials

**Table S1.** Teaching about antibiotic treatment and prudent antibiotic use during my studies.

| Variables               | Yes         | No        | Unsure     | Total    |
|-------------------------|-------------|-----------|------------|----------|
| Prudent antibiotic use  | 340(70.4%)  | 89(18.4%) | 54 (11.2%) | 483(100) |
| Diagnosis of infections | 359(74.3%)  | 69(14.3%) | 55(11.4%)  | 483(100) |
| Antibiotic treatment    | 373 (77.2%) | 69(14.3%) | 41(8.5%)   | 483(100) |

**Table S2.** My examinations included questions on antibiotic treatment or prudent use of antibiotics.

| Variables               | Yes         | No          | Unsure     | Total    |
|-------------------------|-------------|-------------|------------|----------|
| Prudent antibiotic use  | 291 (60.2%) | 125 (25.9%) | 67 (13.9%) | 483(100) |
| Diagnosis of infections | 319 (66.0%) | 104 (21.5%) | 60(12.4%)  | 483(100) |
| Antibiotic treatment    | 338 (70.0%) | 91(18.8%)   | 54(11.2%)  | 483(100) |

**Table S3.** Reference sources being used.

| Sources of reference                                                                                                                                                                                                                                                                                                                                                                                                                                                                        | Frequency  | Percentage (%) |
|---------------------------------------------------------------------------------------------------------------------------------------------------------------------------------------------------------------------------------------------------------------------------------------------------------------------------------------------------------------------------------------------------------------------------------------------------------------------------------------------|------------|----------------|
| Textbooks                                                                                                                                                                                                                                                                                                                                                                                                                                                                                   | 65         | 13.5           |
| Internet Search                                                                                                                                                                                                                                                                                                                                                                                                                                                                             | 43         | 8.9            |
| Emdex                                                                                                                                                                                                                                                                                                                                                                                                                                                                                       | 35         | 7.2            |
| Not sure of any                                                                                                                                                                                                                                                                                                                                                                                                                                                                             | 22         | 4.3            |
| Medscape                                                                                                                                                                                                                                                                                                                                                                                                                                                                                    | 17         | 3.5            |
| BNF                                                                                                                                                                                                                                                                                                                                                                                                                                                                                         | 10         | 2.1            |
| Standard Treatment Guideline                                                                                                                                                                                                                                                                                                                                                                                                                                                                | 7          | 1.4            |
| Textbooks and Internet                                                                                                                                                                                                                                                                                                                                                                                                                                                                      | 6          | 1.2            |
| World Health Organization handbook on Antimicrobial Stewardship                                                                                                                                                                                                                                                                                                                                                                                                                             | 5          | 1              |
| Drug Index                                                                                                                                                                                                                                                                                                                                                                                                                                                                                  | 4          | 0.8            |
| Lecture notes and Internet                                                                                                                                                                                                                                                                                                                                                                                                                                                                  | 4          | 0.8            |
| Lecture notes and textbooks                                                                                                                                                                                                                                                                                                                                                                                                                                                                 | 3          | 0.6            |
| Uganda Clinical Guidelines                                                                                                                                                                                                                                                                                                                                                                                                                                                                  | 3          | 0.6            |
| Internet and Textbooks                                                                                                                                                                                                                                                                                                                                                                                                                                                                      | 2          | 0.4            |
| Kaplan Medical Teachings                                                                                                                                                                                                                                                                                                                                                                                                                                                                    | 2          | 0.4            |
| Others (apps, articles & lectures, Aulton Pharmaceutics, British National Formulary, Clinical pharmacy by Robert Walker, Future Learn, Global Health Antimicrobial Resistance Platform, Google Scholar & School Library, Handouts given by lecturer, Lab Manuals, Lippincott, Mdex, My father is a certified pharmacist, National Multisectoral Antimicrobial Resistance Platform, Newspaper, PubMed journal articles, Tanzania Treatment Guideline, Textbook & Research Methods, Tripathi) | 19         | 3.8            |
| No response                                                                                                                                                                                                                                                                                                                                                                                                                                                                                 | 236        | 48.9           |
| <b>Total</b>                                                                                                                                                                                                                                                                                                                                                                                                                                                                                | <b>483</b> | <b>100.0</b>   |

**Table S4.** Challenges encountered in obtaining current information about drugs.

| <b>Statements</b> | <b>Frequency</b> | <b>Percentage (%)</b> |
|-------------------|------------------|-----------------------|
| Lack of resources | 226              | 50.6                  |
| Internet access   | 133              | 29.8                  |
| Power Outage      | 80               | 17.9                  |
| Laxity            | 2                | 0.2                   |
| None              | 4                | 0.9                   |
| Reliable sources  | 2                | 0.7                   |
| Total             | 447              | 100.0                 |
| No response       | 36               | -                     |

**Table S5.** Social media channels students relate with the most.

| <b>Statements</b> | <b>Frequency</b> | <b>Percentage (%)</b> |
|-------------------|------------------|-----------------------|
| Twitter           | 162              | 33.5                  |
| Instagram         | 114              | 23.6                  |
| Facebook          | 83               | 17.2                  |
| WhatsApp          | 81               | 16.8                  |
| YouTube           | 2                | 0.4                   |
| Others            | 8                | 1.6                   |
| No response       | 33               | 6.8                   |
| <b>Total</b>      | <b>483</b>       | <b>100.0</b>          |

**Table S6.** The highest implicating factor in AMR.

| <b>Statements</b>                            | <b>Frequency</b> | <b>Percentage (%)</b> |
|----------------------------------------------|------------------|-----------------------|
| Not completing a full course of antibiotics  | 174              | 36.6                  |
| Inappropriate antibiotic prescribing         | 168              | 34.8                  |
| Improper management of left-over antibiotics | 45               | 9.3                   |
| Lack of infection control                    | 27               | 5.6                   |
| Poor hygiene                                 | 23               | 4.8                   |
| All the above                                | 2                | 0.4                   |
| Others                                       | 3                | 0.6                   |
| No response                                  | 41               | 8.5                   |
| Total                                        | 483              | 100.0                 |

**Table S7.** Who has the highest responsibility for antimicrobial stewardship?

| <b>Variables</b>         | <b>Frequency</b> | <b>Percentage (%)</b> |
|--------------------------|------------------|-----------------------|
| Healthcare professionals | 275              | 61.8                  |
| Ministry of health       | 118              | 26.5                  |
| Medical institutions     | 43               | 9.7                   |
| Everyone                 | 5                | 1.1                   |
| Patients                 | 2                | 0.4                   |
| All the above            | 1                | 0.2                   |
| Community education      | 1                | 0.2                   |
| Total                    | 445              | 100.0                 |
| No response              | 38               | -                     |
